## Strategies of actin reorganisation in plant cells

Andrei P. Smertenko, Michael J. Deeks and Patrick J. Hussey

*Journal of Cell Science* 123, 3029  
© 2010. Published by The Company of Biologists Ltd  
doi:10.1242/jcs.079749

There were errors published in the e-press version of *J. Cell Sci.* **123**, 3019-3028.

In the Introduction, on page 3019, the second last sentence is incorrect.

The correct sentence should read:

New filaments can be assembled from shorter free cytoplasmic filaments, from the products of F-actin severing and by polymerisation from the ends of extant filaments.

On page 3027, left column, second paragraph, the third sentence incorrectly contains the word 'after' immediately before the word 'separation'.

The correct sentence should read:

For example, the frequency of rings or acuosomes decreases in an aging tobacco BY-2 cell culture (Hasezawa et al., 1988), increases during heat-stress (Chaidee et al., 2008) and following mechanical separation of *Zinnia* mesophyll cells (Frost and Roberts, 1996).

On page 3027, left column, second paragraph, ninth line from bottom.

The number of acuosomes is reduced by 98.9%, and not, as incorrectly stated, by 98%.

We apologise for these mistakes.
